# Supplementary material for: A label-free and time-resolved luminescence strategy for the detection of proteins based on DNA–Tb3+ luminescence quenched by graphene oxide
Source: Royal Society of Chemistry journal article supplement (doi:10.1039/c5an01343g), 2015-01-01
Supplement: c5an01343g1.pdf [file c5an01343g1.pdf]

## Supporting Information

A label-free and time-resolved luminescent strategy for the detection of protein based on DNA-Tb<sup>3+</sup> luminescence quenched by graphene oxide

Hao Li, Wang Li,\* Zhou Nie, Shouzhuo Yao

*State Key Laboratory of Chemo/Biosensing and Chemometrics, College of Chemistry and Chemical Engineering, Hunan University, Changsha, 410082, P. R. China.*

*Fax: +86-731-88821848; Tel: +86-731-88821626;*

*E-mail: [wli@hnu.edu.cn](mailto:wli@hnu.edu.cn)*

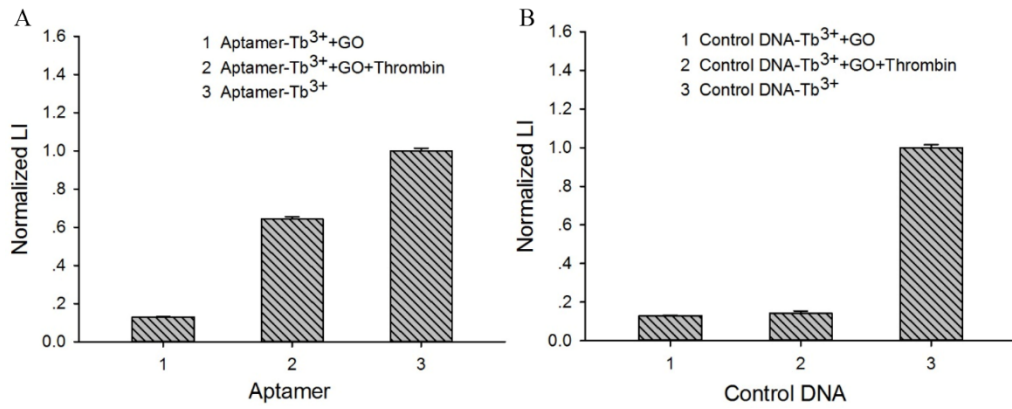

**Figure S1.** (A) Anti-thrombin aptamer binding with thrombin to desorb from the GO. (B) The control DNA interacting with thrombin.

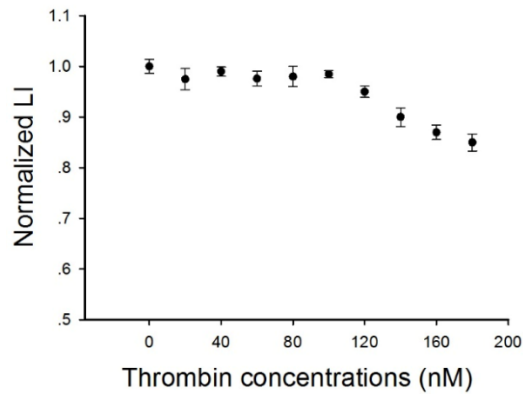

**Figure S2.** The influence of different concentrations thrombin to aptamer-Tb<sup>3+</sup> complex.

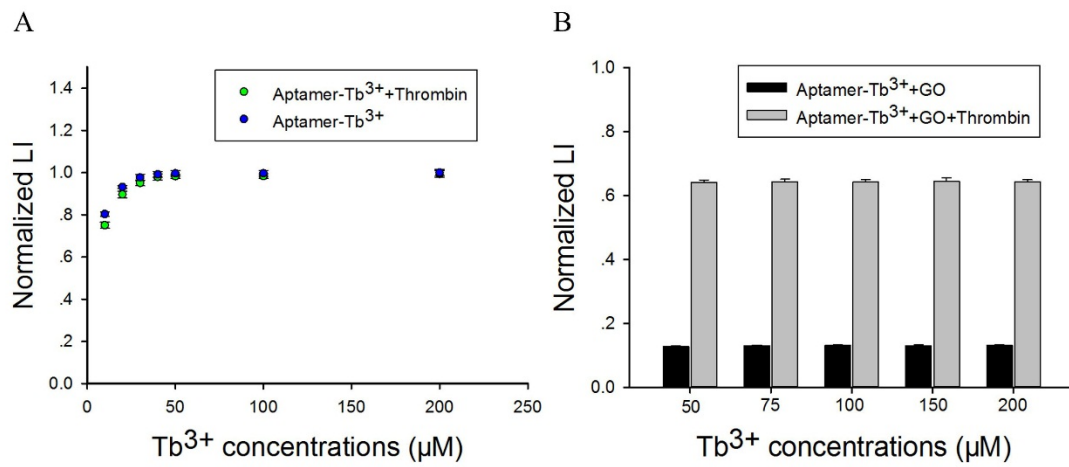

**Figure S3.** (A) The influence of thrombin to the luminescence of Aptamer-Tb<sup>3+</sup> complex for different Tb<sup>3+</sup> concentrations (green dots), luminescence of different concentration of Tb<sup>3+</sup> binding

aptamer complex (blue dots). Thrombin, 100 nM. (B) The influence of  $Tb^{3+}$  concentration to the recovery experiments.

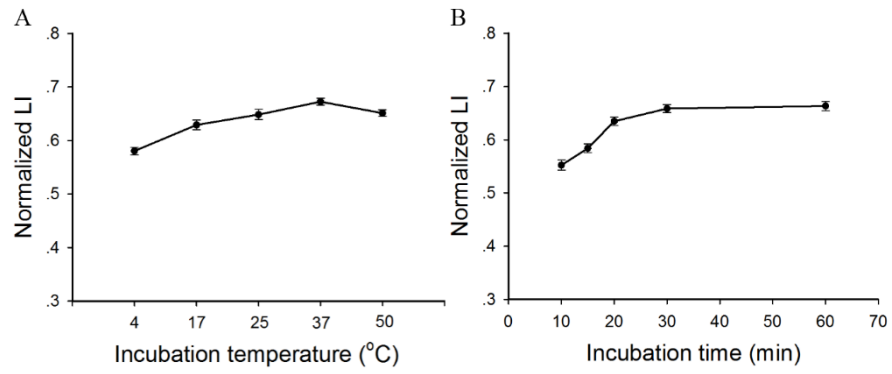

**Figure S4.** (A) The optimization of incubation temperature. (B) The optimization of incubation time.
